# Supplementary material for: Ribosomal Protein S6 Hypofunction in Postmortem Human Brain Links mTORC1-Dependent Signaling and Schizophrenia
Source: PubMed Central journal article supplement (PMC7105616; doi:10.3389/fphar.2020.00344), 2020-03-24

# Supplementary Figure 2

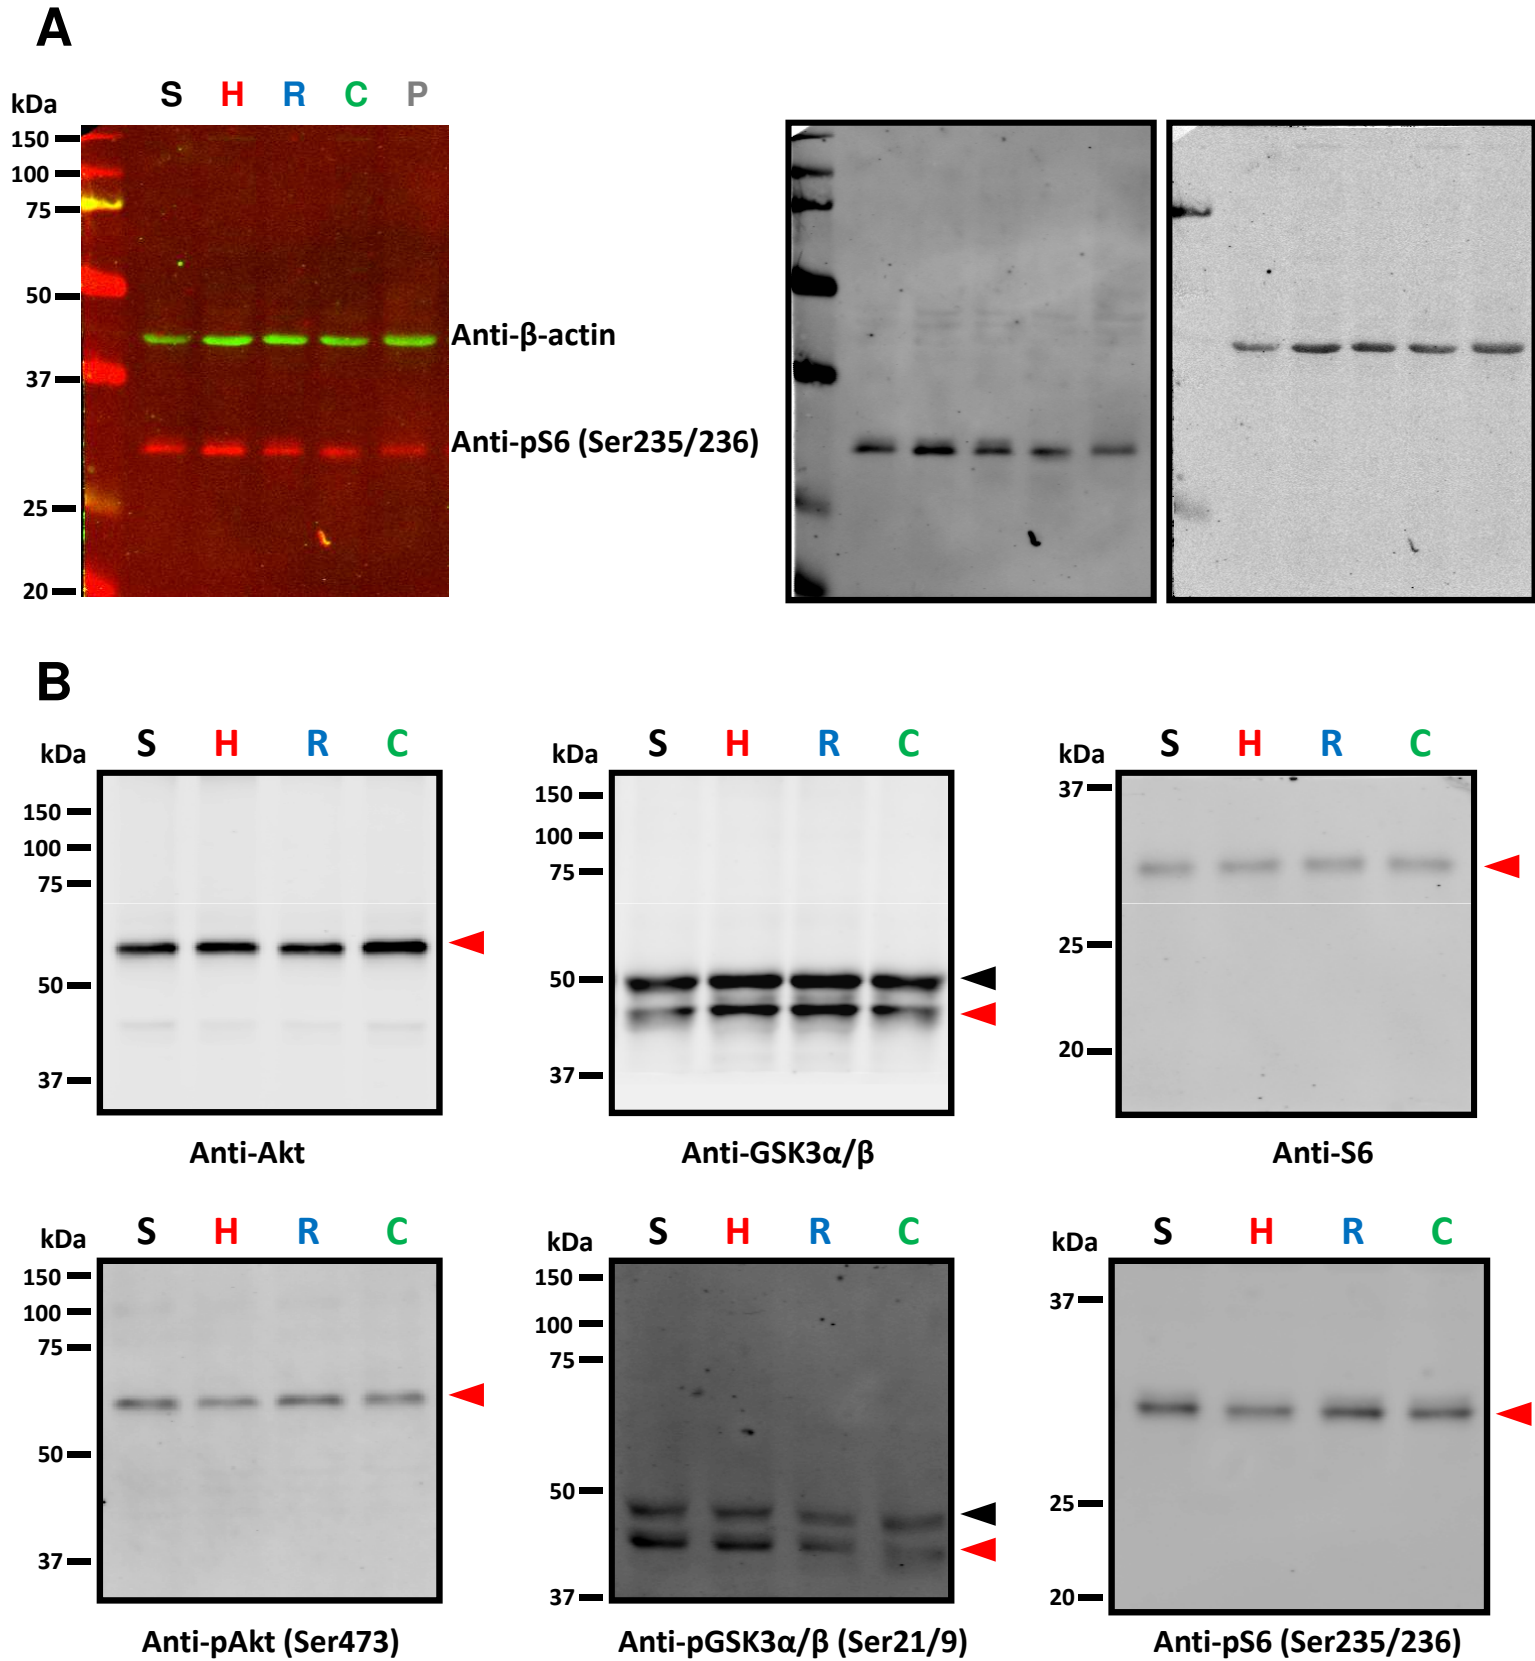

Supplement: Image_2.pdf [file Image_2.pdf]
