# Supplementary material for: Ribosomal Protein S6 Hypofunction in Postmortem Human Brain Links mTORC1-Dependent Signaling and Schizophrenia
Source: PubMed Central journal article supplement (PMC7105616; doi:10.3389/fphar.2020.00344), 2020-03-24
Supplement: Image_3.pdf [file Image_3.pdf]

### Supplementary Figure 3

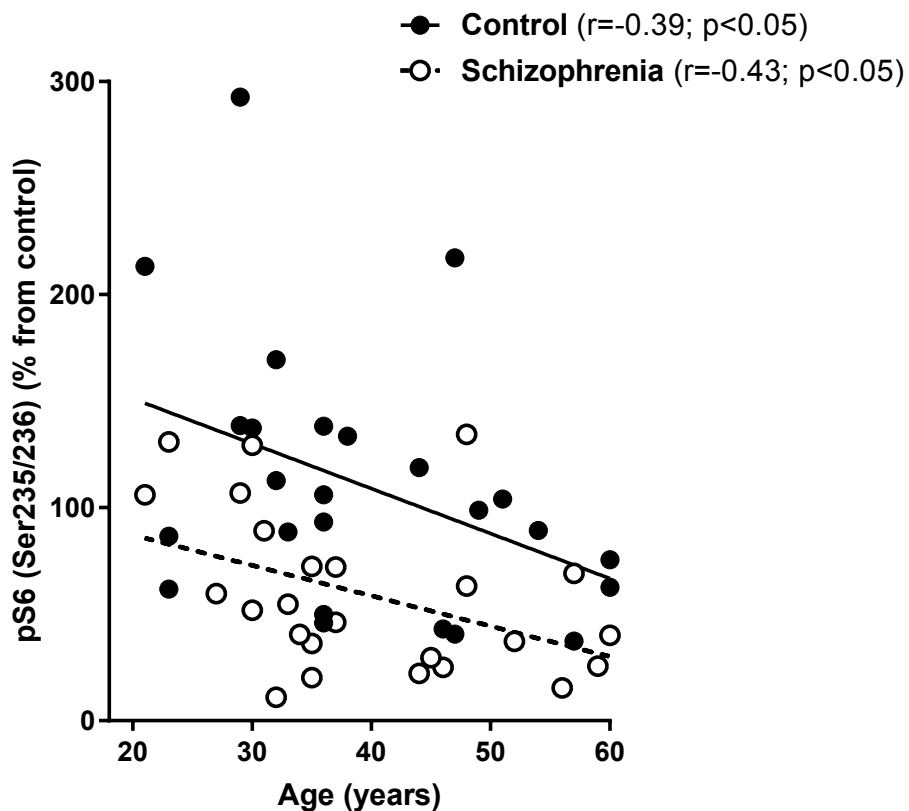

Figure S3. Correlations between pS6 protein levels and age at death in controls (n=25) and schizophrenic subjects (n=25). Linear regressions, r and p values for Pearson's correlations are shown.
