# Supplementary material for: Ribosomal Protein S6 Hypofunction in Postmortem Human Brain Links mTORC1-Dependent Signaling and Schizophrenia
Source: PubMed Central journal article supplement (PMC7105616; doi:10.3389/fphar.2020.00344), 2020-03-24
Supplement: Table_1.pdf [file Table_1.pdf]

**Supplementary Table 1. Demographic characteristics, *postmortem* interval (PMI), cause of death and toxicological study of antipsychotic-free schizophrenic subjects (SCH) and matched control subjects (C).**

| Case     | Gender | Age (years) | PMI (hours) | Storage time (months) | Cause of death   | Psychiatric diagnosis | APs in blood |
|----------|--------|-------------|-------------|-----------------------|------------------|-----------------------|--------------|
| SCH1     | M      | 21          | 24          | 175                   | Suicide/Jumping  | Schizophrenia         | -            |
| C1       | M      | 21          | 30          | 135                   | Accident/Traffic | Control               | -            |
| SCH2     | M      | 30          | 51          | 144                   | Suicide/Jumping  | Schizophrenia         | -            |
| C2       | M      | 29          | 18          | 32                    | Accident/Falling | Control               | -            |
| SCH3     | M      | 29          | 6           | 79                    | Suicide/Asphyxia | Schizophrenia         | -            |
| C3       | M      | 29          | 36          | 137                   | Accident/Traffic | Control               | -            |
| SCH4     | M      | 31          | 14          | 78                    | Suicide/Jumping  | Schizophrenia         | -            |
| C4       | M      | 32          | 28          | 78                    | Accident/Traffic | Control               | -            |
| SCH5     | M      | 48          | 20          | 74                    | Suicide/Train    | Schizophrenia         | -            |
| C5       | M      | 47          | 18          | 94                    | Natural/CRF      | Control               | -            |
| SCH6     | M      | 33          | 14          | 64                    | Suicide/Hanging  | Schizophrenia         | -            |
| C6       | M      | 33          | 4           | 52                    | Accident/Traffic | Control               | -            |
| SCH7     | M      | 45          | 3           | 60                    | Suicide/Gun      | Schizophrenia         | -            |
| C7       | M      | 44          | 21          | 46                    | Accident/Traffic | Control               | -            |
| SCH8     | M      | 27          | 24          | 60                    | Suicide/Gun      | Schizophrenia         | -            |
| C8       | M      | 28          | 30          | 132                   | Accident/Traffic | Control               | -            |
| SCH9     | F      | 37          | 58          | 44                    | Suicide/Overdose | Schizophrenia         | -            |
| C9       | F      | 36          | 38          | 168                   | Homicide/Knife   | Control               | -            |
| SCH10    | M      | 46          | 22          | 35                    | Suicide/Jumping  | Schizophrenia         | -            |
| C10      | M      | 46          | 24          | 23                    | Natural/MI       | Control               | -            |
| SCH11    | F      | 37          | 26          | 9                     | Suicide/Jumping  | Schizophrenia         | -            |
| C11      | F      | 38          | 22          | 6                     | Accident/Traffic | Control               | -            |
| SCH12    | M      | 48          | 11          | 9                     | Suicide/Jumping  | Schizophrenia         | -            |
| C12      | M      | 49          | 8           | 3                     | Natural/CRF      | Control               | -            |
| SCH13    | M      | 35          | 5           | 10                    | Suicide/Hanging  | Schizophrenia         | -            |
| C13      | M      | 38          | 33          | 165                   | Accident/Traffic | Control               | -            |
| SCH14    | F      | 59          | 9           | 15                    | Natural/CRF      | Schizophrenia         | -            |
| C14      | F      | 58          | 20          | 136                   | Natural/CRF      | Control               | -            |
| SCH15    | M      | 45          | 18          | 19                    | Suicide/Jumping  | Schizophrenia         | -            |
| C15      | M      | 47          | 15          | 4                     | Accident/traffic | Control               | -            |
| SCH16    | M      | 34          | 15          | 21                    | Natural/CRF      | Schizophrenia         | -            |
| C16      | M      | 36          | 48          | 15                    | Natural/CRF      | Control               | -            |
| SCH17    | M      | 52          | 7           | 26                    | Suicide/Jumping  | Schizophrenia         | -            |
| C17      | M      | 51          | 13          | 6                     | Accident/Traffic | Control               | -            |
| Sch AP-F | 14M/3F | 38.6±2      | 19.2±3      | 54.2±11               |                  |                       |              |
| C        | 14M/3F | 40.3±3      | 23.8±3      | 48.7±13               |                  |                       |              |

F (Female), M (Male), CRF (cardiorespiratory failure), MI (myocardial infarct), APs (antipsychotics). Mean ± S.E.M.
