# Supplementary material for: Ribosomal Protein S6 Hypofunction in Postmortem Human Brain Links mTORC1-Dependent Signaling and Schizophrenia
Source: PubMed Central journal article supplement (PMC7105616; doi:10.3389/fphar.2020.00344), 2020-03-24
Supplement: Table_2.pdf [file Table_2.pdf]

**Supplementary Table 2. Demographic characteristics, *postmortem* interval (PMI), cause of death and toxicological study of antipsychotic treated schizophrenic subjects (SCH) and matched control subjects (C).**

| Case     | Gender | Age (years) | PMI (hours) | Storage time (months) | Cause of death         | Psychiatric diagnosis | APs in blood |
|----------|--------|-------------|-------------|-----------------------|------------------------|-----------------------|--------------|
| SCH18    | M      | 44          | 7           | 84                    | Natural/CRF            | Schizophrenia         | CTP          |
| C18      | M      | 44          | 23          | 4                     | Accident/Traffic       | Control               | -            |
| SCH19    | M      | 30          | 18          | 81                    | Suicide/Jumping        | Schizophrenia         | OLZ          |
| C19      | M      | 30          | 11          | 82                    | Accident/Electrocution | Control               | -            |
| SCH20    | M      | 32          | 8           | 77                    | Suicide/Hanging        | Schizophrenia         | QTP          |
| C20      | M      | 32          | 20          | 135                   | Accident/Crushing      | Control               | -            |
| SCH21    | M      | 23          | 16          | 72                    | Suicide/Jumping        | Schizophrenia         | SLP          |
| C21      | M      | 23          | 17          | 45                    | Accident/Electrocution | Control               | -            |
| SCH22    | M      | 35          | 3           | 72                    | Suicide/Jumping        | Schizophrenia         | QTP          |
| C22      | M      | 36          | 23          | 4                     | Accident/Crushing      | Control               | -            |
| SCH23    | M      | 35          | 11          | 24                    | Natural/CRF            | Schizophrenia         | CLZ          |
| C23      | M      | 36          | 18          | 94                    | Accident/Traffic       | Control               | -            |
| SCH24    | F      | 60          | 23          | 14                    | Natural/Peritonitis    | Schizophrenia         | ASLP/CLZ     |
| C24      | F      | 60          | 48          | 20                    | Natural/CH             | Control               | -            |
| SCH25    | M      | 56          | 12          | 19                    | Natural/CRF            | Schizophrenia         | OLZ/CLT      |
| C25      | M      | 54          | 16          | 10                    | Accident/Traffic       | Control               | -            |
| SCH26    | F      | 30          | 17          | 24                    | Suicide/Jumping        | Schizophrenia         | HLP          |
| C26      | F      | 30          | 18          | 17                    | Accident/Traffic       | Control               | -            |
| SCH27    | M      | 57          | 19          | 24                    | Suicide/Train          | Schizophrenia         | QTP          |
| C27      | F      | 57          | 14          | 21                    | Natural/CRF            | Control               | -            |
| SCH28    | M      | 26          | 39          | 19                    | Suicide/Jumping        | Schizophrenia         | OLZ          |
| C28      | M      | 25          | 18          | 14                    | Accident/Fire          | Control               | -            |
| Sch AP-T | 9M/2F  | 38.9±3      | 16.1±2      | 46.3±9                |                        |                       |              |
| C        | 8M/3F  | 36.6±3      | 20.4±2      | 41.4±1                |                        |                       |              |

F (Female), M (Male), CRF (cardiorespiratory failure), CH (cerebral hemorrhage). Antipsychotics (APs) in blood are coded as ASLP (amisulpiride), BIP (biperiden), CLZ (clozapine), CTP (clotiapine), HLP (haloperidol), OLZ (olanzapine), QTP (quetiapine), SLP (sulpiride). Mean ± S.E.M.
