# Supplementary material for: Ribosomal Protein S6 Hypofunction in Postmortem Human Brain Links mTORC1-Dependent Signaling and Schizophrenia
Source: PubMed Central journal article supplement (PMC7105616; doi:10.3389/fphar.2020.00344), 2020-03-24
Supplement: Table_3.pdf [file Table_3.pdf]

**Supplementary Table 3.**

| Antibody type | Clonality                   | Target                                            | Host   | Company           | Reference # | Lot      | Dilution           |
|---------------|-----------------------------|---------------------------------------------------|--------|-------------------|-------------|----------|--------------------|
| Primary       | Polyclonal                  | Akt                                               | Rabbit | Cell Signaling    | 9272        | 25       | 1:500              |
| Primary       | Monoclonal (clone D9E)      | Phospho(Ser <sup>473</sup> )-Akt                  | Rabbit | Cell Signaling    | 4060        | 19       | 1:500              |
| Primary       | Monoclonal (clone 54D2)     | S6                                                | Mouse  | Cell Signaling    | 2317        | 4        | 1:250              |
| Primary       | Monoclonal (clone D57.2.2E) | Phospho(Ser <sup>235/236</sup> )-S6               | Rabbit | Cell Signaling    | 4858        | 11       | 1:250              |
| Primary       | Monoclonal (clone 4G-1E)    | GSK3 $\alpha/\beta$                               | Mouse  | Merck Millipore   | 05-412      | 2303952  | 1:500              |
| Primary       | Polyclonal                  | Phospho(Ser <sup>21/9</sup> )-GSK3 $\alpha/\beta$ | Rabbit | Cell Signaling    | 9331        | 15       | 1:250              |
| Primary       | Polyclonal                  | $\beta$ -actin                                    | Rabbit | Abcam             | ab8227      | 133004   | 1:20,000           |
| Primary       | Monoclonal (clone AC-15)    | $\beta$ -actin                                    | Mouse  | Sigma Aldrich     | A1978       | 104K4787 | 1:200,000          |
| Secondary     | Polyclonal                  | Alexa Fluor 680 anti-Rabbit IgG (H+L)             | Goat   | Thermo Fisher Sc. | A21076      | 47704A   | 1:4,000            |
| Secondary     | Polyclonal                  | Alexa Fluor 680 anti-Mouse IgG (H+L)              | Goat   | Thermo Fisher Sc. | A21057      | 44888A   | 1:4,000            |
| Secondary     | Polyclonal                  | IRDye 800 Anti-Rabbit IgG (H+L)                   | Donkey | Rockland Immunoc. | 611-732-127 | 22882    | 1:5,000 - 1:20,000 |
| Secondary     | Polyclonal                  | IRDye 800 Anti-Mouse IgG (H+L)                    | Donkey | Rockland Immunoc. | 610-731-124 | 18249    | 1:5,000 - 1:10,000 |

**Details of the antibodies used and their dilutions for human PFC experiments**

| Antibody type | Clonality                   | Target                                            | Host   | Company           | Reference # | Lot      | Dilution           |
|---------------|-----------------------------|---------------------------------------------------|--------|-------------------|-------------|----------|--------------------|
| Primary       | Polyclonal                  | Akt                                               | Rabbit | Cell Signaling    | 9272        | 25       | 1:500              |
| Primary       | Monoclonal (clone D9E)      | Phospho(Ser <sup>473</sup> )-Akt                  | Rabbit | Cell Signaling    | 4060        | 19       | 1:500              |
| Primary       | Monoclonal (clone 54D2)     | S6                                                | Mouse  | Cell Signaling    | 2317        | 4        | 1:500              |
| Primary       | Monoclonal (clone D57.2.2E) | Phospho(Ser <sup>235/236</sup> )-S6               | Rabbit | Cell Signaling    | 4858        | 11       | 1:500              |
| Primary       | Monoclonal (clone 4G-1E)    | GSK3 $\alpha/\beta$                               | Mouse  | Merck Millipore   | 05-412      | 2303952  | 1:500              |
| Primary       | Polyclonal                  | Phospho(Ser <sup>21/9</sup> )-GSK3 $\alpha/\beta$ | Rabbit | Cell Signaling    | 9331        | 15       | 1:500              |
| Primary       | Polyclonal                  | $\beta$ -actin                                    | Rabbit | Abcam             | ab8227      | 133004   | 1:20,000           |
| Primary       | Monoclonal (clone AC-15)    | $\beta$ -actin                                    | Mouse  | Sigma Aldrich     | A1978       | 104K4787 | 1:100,000          |
| Secondary     | Polyclonal                  | Alexa Fluor 680 anti-Rabbit IgG (H+L)             | Goat   | Thermo Fisher Sc. | A21076      | 47704A   | 1:4,000 - 1:5,000  |
| Secondary     | Polyclonal                  | Alexa Fluor 680 anti-Mouse IgG (H+L)              | Goat   | Thermo Fisher Sc. | A21057      | 44888A   | 1:4,000 - 1:5,000  |
| Secondary     | Polyclonal                  | Dylight 800 Anti-Rabbit IgG (H+L)                 | Donkey | Rockland Immunoc. | 611-745-127 | 22882    | 1:5,000 - 1:10,000 |
| Secondary     | Polyclonal                  | Dylight 800 Anti-Mouse IgG (H+L)                  | Donkey | Rockland Immunoc. | 610-745-002 | 23294    | 1:5,000 - 1:10,000 |

**Details of the antibodies used and their dilutions for rat cortex experiments**

IgG = Immunoglobulin G; H+L = heavy and low chains; Immunoc. = Immunochemicals; Sc. = Scientific.
